# Supplementary material for: Novel supramolecular organogels based on a hydrazide derivative: non-polar solvent-assisted self-assembly, selective gelation properties, nanostructure, solvent dynamics
Source: Royal Society of Chemistry journal article supplement (doi:10.1039/c3sm51433a), 2013-01-01
Supplement: c3sm51433a.pdf [file c3sm51433a.pdf]

## Electronic supplementary information (ESI)

Figure S1. Dependence of the gel-sol phase transition,  $T_{gs}$ , on the gelator **1** concentration in benzene, toluene and *p*-xylene gels. The solid lines have no physical meaning and are included as a visual guide.

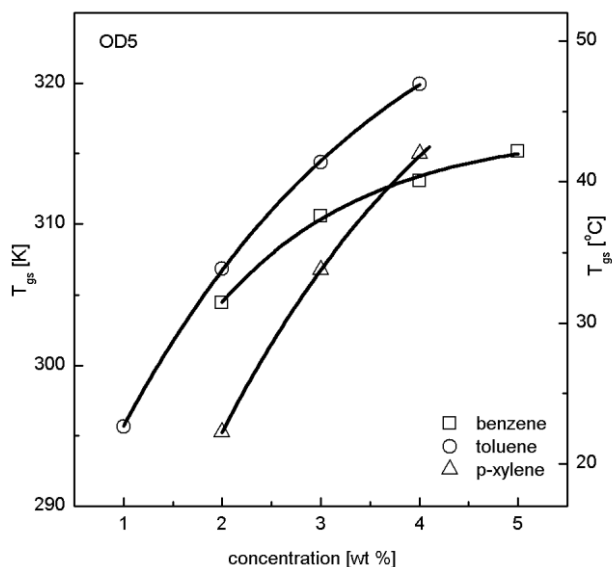

Figure S2. NMRD curves for non degassed bulk solvents measured as a function of the magnetic field strength reported as the proton Larmor frequency (bottom) and electron Larmor frequency (top). The solid lines are the best fit of eqn (7) to the experimental points.

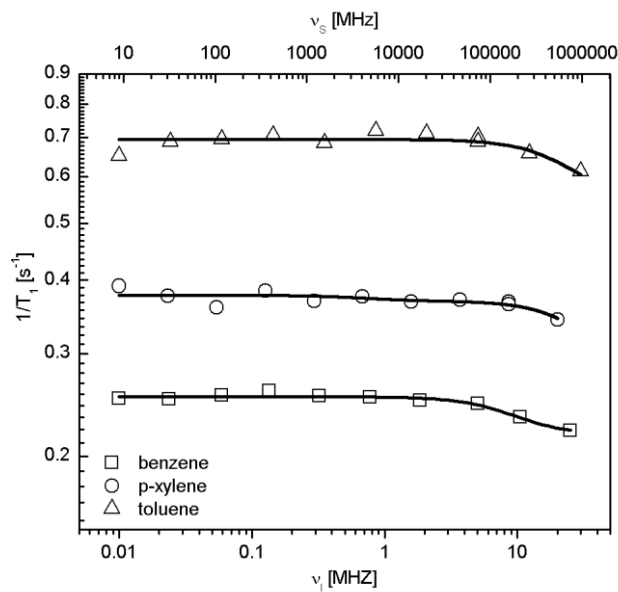

Table S1. Experimental and calculated vibrational transitions for gelator **1** molecule;  $\nu$  - wavenumbers ( $\text{cm}^{-1}$ ),  $I$  -IR intensity ( $\text{km mol}^{-1}$ ),  $A$  – Raman scattering activity ( $\text{\AA}^4 \text{amu}$ ).

| Experiment <sup>(a)</sup> |                      | Calculation <sup>(b)</sup> |                          |          |          | Approximate description <sup>(d)</sup> |
|---------------------------|----------------------|----------------------------|--------------------------|----------|----------|----------------------------------------|
| $\nu_{\text{IR}}$         | $\nu_{\text{Raman}}$ | $\nu$                      | $\nu_{\text{nor}}^{(c)}$ | $I$      | $A$      |                                        |
|                           | 156m                 | 152                        | 146                      | 18.4369  | 8.0955   | NH <sub>2</sub> rck                    |
|                           | 175w                 | 164                        | 158                      | 5.4769   | 1.3468   | def oop                                |
|                           | 209vw                | 215                        | 207                      | 0.7117   | 5.7643   | def ip                                 |
|                           | 245w                 | 238                        | 229                      | 4.0521   | 2.3991   | def oop                                |
|                           | 279w                 | 285                        | 274                      | 10.0547  | 1.7881   | ring def oop                           |
|                           | 318m                 | 310                        | 298                      | 6.8261   | 7.2669   | ring def oop                           |
|                           | 334w                 | 334                        | 321                      | 31.5746  | 2.2067   | N-N-C b ip                             |
|                           | 359w                 | 359                        | 345                      | 4.1742   | 1.6383   | benzene def oop                        |
|                           | 376m                 | 378                        | 363                      | 12.9336  | 6.3084   | benzene def oop                        |
| 426vw                     | 426w                 | 420                        | 404                      | 5.3618   | 5.724    | benzene def oop                        |
| 466vw                     | 462w                 | 484                        | 465                      | 3.0401   | 5.3972   | ring def ip                            |
| 488vw                     | 487vw                | 514                        | 494                      | 116.4822 | 6.5129   | N-H b oop                              |
| 519vw                     | 522w                 | 564                        | 542                      | 13.4105  | 6.9406   | C-C-C b oop                            |
|                           | 567w                 | 617                        | 593                      | 2.0383   | 6.0833   | C-C-N b ip                             |
| 646w                      | 650s                 | 656                        | 631                      | 20.6637  | 14.7442  | C-C-C b ip                             |
| 677vw                     | 681w                 | 681                        | 655                      | 10.4994  | 2.8726   | C-C-C b oop                            |
| 713vw                     | 714vw                | 733                        | 705                      | 10.0646  | 3.6574   | C-C-C b oop                            |
| 756w                      | 753s                 | 770                        | 740                      | 13.5028  | 7.0123   | C-N b oop+C-H b oop                    |
| 769sh                     | 769w                 | 774                        | 744                      | 9.9448   | 4.9048   | C-N b oop+C-H b oop                    |
| 833w                      |                      | 852                        | 819                      | 1.6359   | 2.044    | C-O str+CH <sub>2</sub> rck            |
| 846w                      | 851m                 | 860                        | 827                      | 20.7645  | 11.8539  | NO <sub>2</sub> scis+N-N-N b ip        |
| 859vw                     | 862m                 | 872                        | 838                      | 5.6494   | 10.8539  | CH <sub>2</sub> rck                    |
| 917w                      | 920w                 | 952                        | 915                      | 16.1423  | 7.1553   | C-C-C b ip+NH <sub>2</sub> wag         |
| 942w                      | 943w                 | 972                        | 934                      | 90.6577  | 11.413   | C-H b oop+CH <sub>2</sub> rck          |
| 977w                      | 980vw                | 1029                       | 989                      | 3.7884   | 10.325   | C-N str                                |
|                           | 1016vw               | 1060                       | 1019                     | 34.1106  | 18.4477  | C-N-C b ip                             |
| 1044w                     | 1045w                | 1084                       | 1042                     | 12.9285  | 2.4798   | CH <sub>2</sub> rck                    |
| 1067w                     | 1068vw               | 1098                       | 1056                     | 22.2418  | 4.8487   | C-N str                                |
| 1081vw                    | 1080w                | 1106                       | 1063                     | 2.3469   | 6.8098   | C-N str+NH <sub>2</sub> wag            |
| 1113m                     | 1112w                | 1131                       | 1087                     | 90.8016  | 13.079   | C-O str+C-C str                        |
| 1118sh                    | 1122vw               | 1168                       | 1123                     | 20.8797  | 7.7378   | C-N str+C-H b ip                       |
| 1150vw                    | 1150vw               | 1196                       | 1150                     | 54.4868  | 20.0334  | C-N str+C-H b ip                       |
| 1176vw                    | 1178sh               | 1216                       | 1169                     | 11.9833  | 73.1072  | N-N str+C-C str                        |
| 1191w                     | 1191m                | 1238                       | 1190                     | 18.2149  | 16.6461  | CH <sub>2</sub> tw                     |
| 1215w                     | 1218m                | 1260                       | 1211                     | 171.0506 | 26.8502  | C-N str+CH <sub>2</sub> tw             |
| 1236m                     | 1241m                | 1281                       | 1231                     | 50.7907  | 5.9455   | C-H b ip+CH <sub>2</sub> tw            |
| 1257w                     | 1261w                | 1302                       | 1252                     | 228.5949 | 139.6885 | C-C str+N-N str+C-H b ip               |
| 1276w                     | 1281s                | 1314                       | 1263                     | 28.9892  | 39.1447  | C-C str+C-H b ip                       |
| 1293w                     | 1290sh               | 1327                       | 1276                     | 57.652   | 24.3401  | CH <sub>2</sub> tw                     |
| 1302w                     | 1299s                | 1333                       | 1281                     | 33.8362  | 24.4048  | CH <sub>2</sub> tw                     |
| 1333m                     |                      | 1351                       | 1299                     | 8.0097   | 6.8558   | NH <sub>2</sub> tw                     |
| 1345m                     | 1348vs               | 1361                       | 1308                     | 205.3756 | 108.2845 | C-N str                                |
| 1353sh                    |                      | 1413                       | 1358                     | 93.8967  | 4.1007   | C-N str+CH <sub>2</sub> wag            |
| 1380w                     | 1375sh               | 1436                       | 1380                     | 21.9244  | 28.5344  | C=C str+C-N str                        |
| 1450w                     | 1449vw               | 1490                       | 1432                     | 187.7616 | 29.9071  | N-H b ip+CH <sub>2</sub> scis          |
| 1457sh                    | 1464vw               | 1502                       | 1444                     | 94.2035  | 4.4488   | N-H b ip+CH <sub>2</sub> scis          |
| 1496m                     | 1496vw               | 1539                       | 1479                     | 29.2301  | 31.0322  | C-N str                                |
| 1521vs                    | 1521vw               | 1566                       | 1505                     | 69.9167  | 76.6854  | C=C str+N=O asym str                   |
| 1555sh                    | 1555m                | 1584                       | 1523                     | 210.2549 | 21.457   | C=C str+N=O asym str                   |
| 1616vs                    | 1619m                | 1652                       | 1588                     | 323.6646 | 264.2258 | C=C str                                |
| 1636m                     |                      | 1705                       | 1639                     | 122.068  | 3.9605   | NH <sub>2</sub> scis+C=O str           |
| 1657m                     | 1650m                | 1724                       | 1657                     | 191.4801 | 170.8803 | C=O str+NH <sub>2</sub> scis           |
| 2832vw                    |                      | 2961                       | 2846                     | 45.8613  | 137.7087 | CH <sub>2</sub> sym str                |
| 2860w                     | 2863vw               | 2972                       | 2857                     | 61.2436  | 235.341  | CH <sub>2</sub> sym str                |
| 2898vw                    | 2896vw               | 2992                       | 2876                     | 48.4888  | 65.512   | CH <sub>2</sub> sym str                |
| 2923vw                    | 2924vw               | 3017                       | 2900                     | 36.0166  | 68.4949  | CH <sub>2</sub> sym str                |
| 2963vw                    | 2968vw               | 3093                       | 2973                     | 13.3159  | 45.4619  | CH <sub>2</sub> asym str               |
|                           | 3043vw               | 3157                       | 3035                     | 6.9933   | 29.2384  | CH <sub>2</sub> asym str               |
| 3077vw                    | 3080vw               | 3196                       | 3072                     | 0.1211   | 52.6515  | C-H str in benzene                     |
| 3102vw                    | 3100vw               | 3215                       | 3091                     | 5.4163   | 115.6617 | C-H str in benzene                     |
| 3310m                     | 3311vw               | 3461                       | 3327                     | 2.2865   | 197.7792 | NH <sub>2</sub> sym str                |
| 3343m                     | 3340vw               | 3527                       | 3391                     | 8.5385   | 75.331   | NH <sub>2</sub> asym str               |
| 3480sh                    |                      | 3621                       | 3481                     | 43.4442  | 41.3151  | N-H str                                |

<sup>(a)</sup> vs=very strong, s=strong, m=medium, w=weak, vw=very weak, sh=shoulder.

<sup>(b)</sup> Calculations have been performed for OD5 at BLYP/6-311++G(d,p) theory level.

<sup>(c)</sup> Calculated frequencies were scaled by the factor of 0.9613 [Wong1996].

<sup>(d)</sup> Approximate mode description: str=stretching, def=deformation, b=bending, wag=wagging, tw=twisting, rck=rocking, scis=scissoring, ip=in-plane, oop=out of plane, sym=symmetrical, asym=antisymmetrical.

Table S2. Excitation energies ( $\Delta E$  in eV), wavelength ( $\lambda$  in nm), oscillator strengths  $f$ , and characterization of the excited singlet states for the gelator molecule.

| Experiment |           | Theory <sup>(a)</sup> |           |        | Charakter <sup>(b)</sup>                                                                                      |
|------------|-----------|-----------------------|-----------|--------|---------------------------------------------------------------------------------------------------------------|
| $\Delta E$ | $\lambda$ | $\Delta E$            | $\lambda$ | $f$    |                                                                                                               |
| 3.12       | 398       | 3.02                  | 411       | 0.0411 | HOMO→LUMO (91%) $\pi \rightarrow \pi^*$                                                                       |
| 4.28       | 290       | 4.28                  | 290       | 0.1914 | H-7→LUMO (10%), H-3→LUMO (30%), HOMO→L+1 (46%)                                                                |
|            |           | 4.75                  | 261       | 0.1328 | H-7→LUMO (21%), H-6→LUMO (15%), H-4→LUMO (26%) $\pi \rightarrow \pi^* + n \rightarrow \pi^*$                  |
| 5.17       | 240       | 5.17                  | 240       | 0.0476 | H-10→LUMO (20%), H-9→LUMO (20%), H-7→LUMO (26%), H-6→LUMO (12%) $\pi \rightarrow \pi^* + n \rightarrow \pi^*$ |

(a)TD-B3LYP/6-311++G(d,p) method has been employed to obtain the energies of the first 150 singlet-singlet electronic transitions

(b)H means the highest occupied molecular orbital (HOMO), L means the lowest unoccupied molecular orbital (LUMO)
